# Supplementary material
Source: Springer Nature journal article supplement (https://www.springermedizin.de/resource/supplementary/12889_2006_500_MOESM4_ESM.pdf/9501012)

HRR

6

5

4

3

2

1

0

**Cardiovascular mortality**

**All-cause mortality**

P for trend < 0.001

P for trend = 0.01

P for trend < 0.001

P for trend = 0.003

0 1 2 3

0 1 2 3

0 1 2 3

0 1 2 3

**Men**

**Women**

**Men**

**Women**

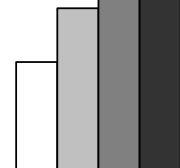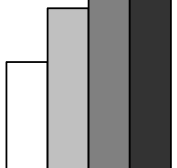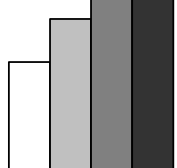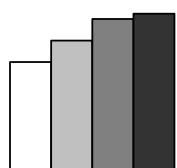

Supplement: MOESM4 [file 9501012]
